# Supplementary material for: The synthesis and super capacitive characterization of microwave-assisted highly crystalline α-Fe2O3/Fe3O4 nanoheterostructures
Source: Royal Society of Chemistry journal article supplement (doi:10.1039/d3ra01967e), 2023-01-01
Supplement: d3ra01967e1.pdf [file d3ra01967e1.pdf]

SUPPORTING INFORMATION

**The synthesis and super capacitive characterization of microwave-assisted highly crystalline  $\alpha$ -Fe<sub>2</sub>O<sub>3</sub>/Fe<sub>3</sub>O<sub>4</sub> nanoheterostructure**

Rajendra Panmand<sup>1</sup>, Yogesh Sethi<sup>1</sup>, Animesh Jha<sup>2</sup>, Bharat Kale<sup>1\*</sup>

Figure SI 1

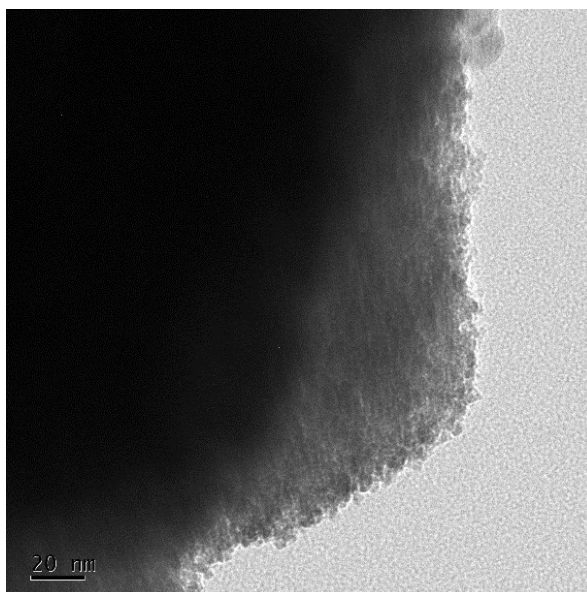

Figure SI 1 TEM image of Fe<sub>2</sub>O<sub>3</sub>/Fe<sub>3</sub>O<sub>4</sub> nanocomposite prepared at 1:3 Water to EG solvent ratios

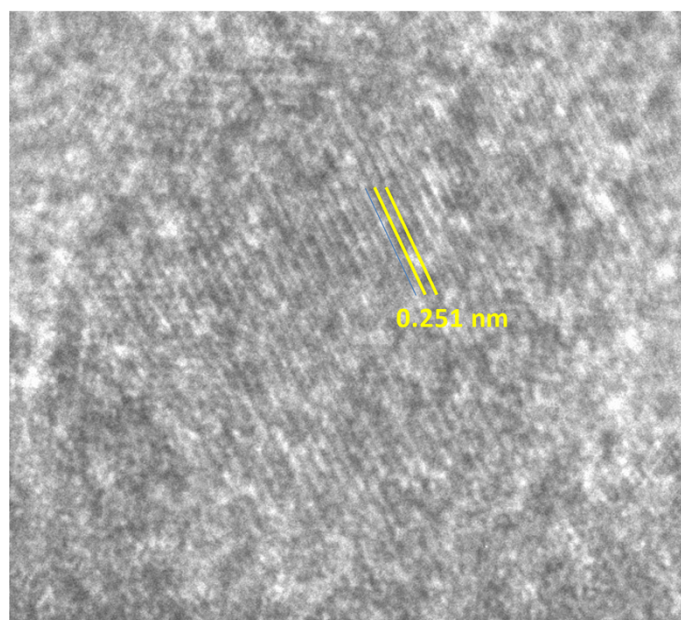

Figure SI 2 lattice resolved HRTEM of Fe<sub>2</sub>O<sub>3</sub> on Fe<sub>2</sub>O<sub>3</sub> nanoparticles.

Figure SI3

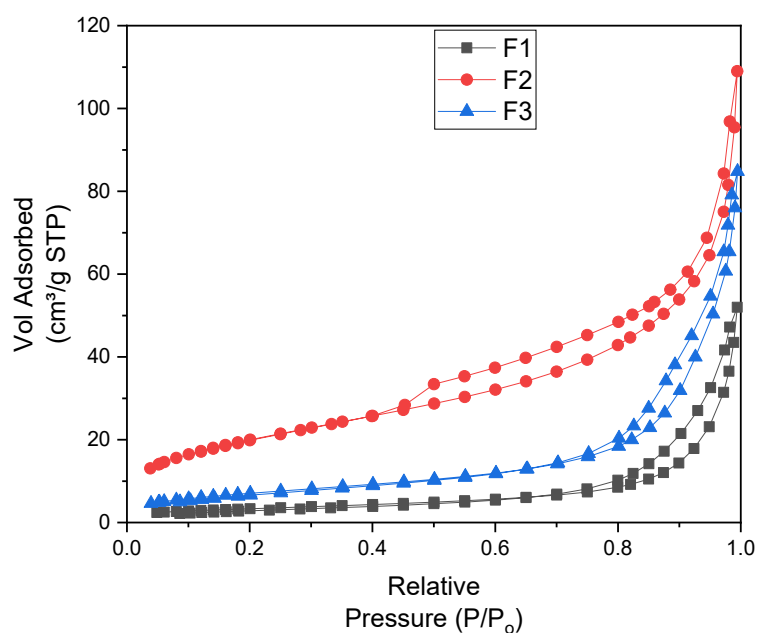

Figure SI3: Nitrogen adsorption and desorption isotherms of F1, F2 and F3.

Table SI1: Comparison of supercapacitance with reported values.

| Material                                                                                    | Supercapacitance (F/g) |
|---------------------------------------------------------------------------------------------|------------------------|
| a-Fe <sub>2</sub> O <sub>3</sub> /Fe <sub>3</sub> O <sub>4</sub> heterostructure (ref 1)    | 150 @ 0.5mA/g          |
| Fe <sub>2</sub> O <sub>3</sub> -Fe <sub>3</sub> O <sub>4</sub> /N-rGO (Ref 2)               | 120 @ 0.8 A/g          |
| Fe <sub>3</sub> O <sub>4</sub> /Fe <sub>2</sub> O <sub>3</sub> heterostructures (This work) | 165 @ 0.5mA/g          |
| Fe <sub>3</sub> O <sub>4</sub> nanoparticles (This work)                                    | 143 @ 0.5mA/g          |
| Fe <sub>3</sub> O <sub>4</sub> nanoparticles (Ref 3)                                        | 95.4 @ 1.0mA/g         |
| Fe <sub>3</sub> O <sub>4</sub> nanoparticles (Ref 4)                                        | 145 @ 0.5mA/g          |

1. Dejian Chen et al. RSC Adv., 2016, 6, 45023
2. Sourav Mallick et al. ChemElectroChem 2018, 5, 2348 – 2356.
3. P.M.Anjan et al., Materials Science and Engineering: B, 2023, 290, 116313
4. T. Arun et al. *Applied Surface Science* 485 (2019) 147–157
